# Supplementary material for: Blockade of Transient Receptor Potential Vanilloid 4 Enhances Antioxidation after Myocardial Ischemia/Reperfusion
Source: Hindawi journal article supplement (doi:10.1155/2019/7283683), 2019-06-16
Supplement: f1 [file 7283683.f1.pdf]

## Supplementary Data

Figure S1

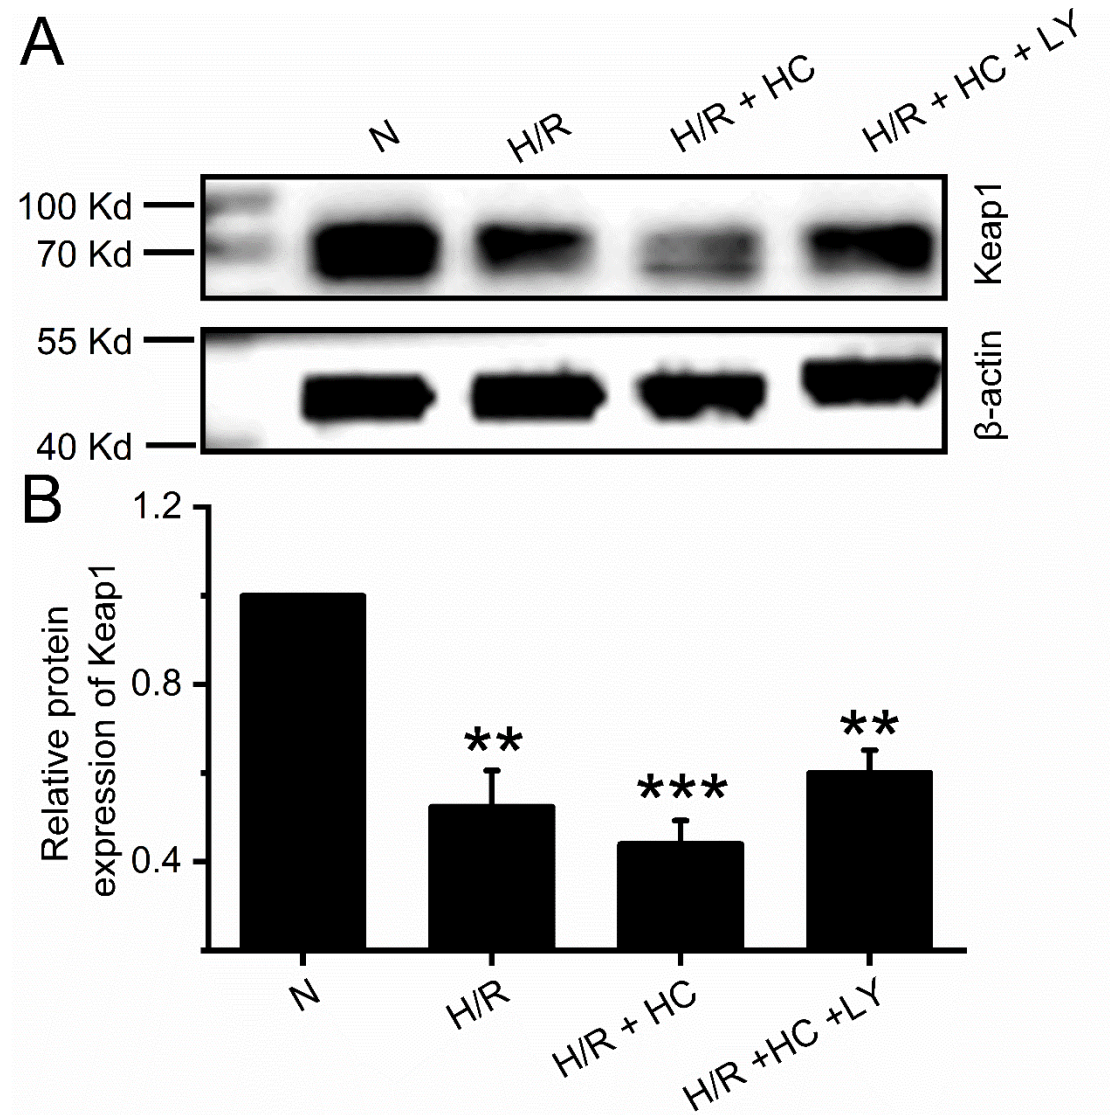

Figure S1. The effect of TRPV4 antagonist HC on Keap1 expression in H9C2 cells exposed to H/R. The expression of Keap1 was examined by Western blot assay (A) quantified by densitometric analysis (B).  $\beta$ -actin was used as an internal control. Anti-Keap1 antibody was purchased from Proteintech (10503-2-AP). Values are presented as mean  $\pm$  SEM,  $n = 3$  for all groups. We used a one-way ANOVA followed by a Bonferroni test. \*\*  $p < 0.01$ , \*\*\*  $p < 0.001$  vs. N.

Figure S2

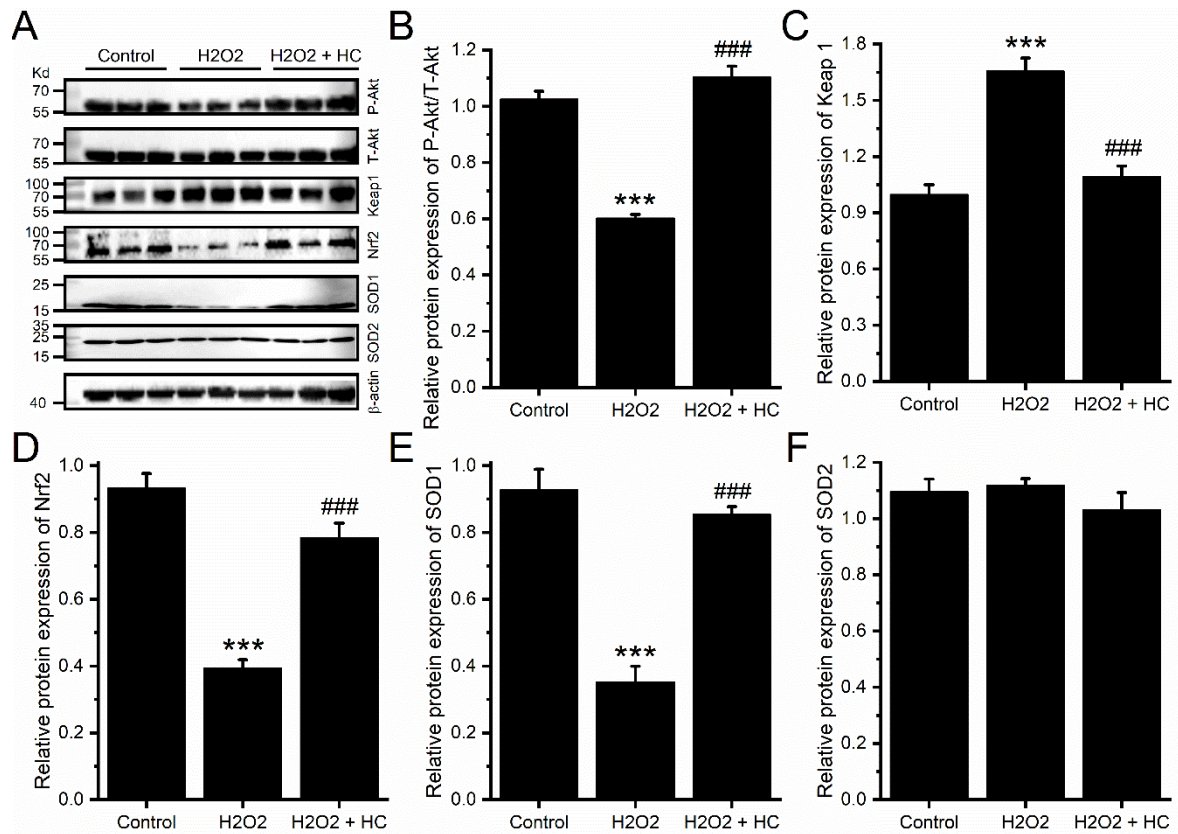

Figure S2. The effect of TRPV4 antagonist HC on Akt, Keap1, Nrf2, SOD1, and SOD2 expression in isolated hearts exposed to H<sub>2</sub>O<sub>2</sub>. Representative blots (A) and the histogram of the expression of P-Akt/T-Akt (B), Keap1 (C), Nrf2 (D), SOD1(E), and SOD2 (F).  $\beta$ -actin was used as an internal control. Values are presented as mean  $\pm$  SEM, n = 6 for all groups. We used a one-way ANOVA followed by a Bonferroni test. \*\*\* p < 0.001 vs. control; ### p < 0.001 vs. H<sub>2</sub>O<sub>2</sub>.
